## RESEARCH ARTICLE

# Factors associated with smartphone addiction: A comparative study between Japanese and Thai high school students

Arunrat Tangmunkongvorakul<sup>1</sup>, Patou Masika Musumari<sup>1,2\*</sup>, Yukie Tsubohara<sup>1</sup>, Pisittawoot Ayood<sup>3</sup>, Kriengkrai Srithanaviboonchai<sup>1,4</sup>, Teeranee Techasrivichien<sup>5</sup>, S. Pilar Suguimoto<sup>5,6</sup>, Masako Ono-Kihara<sup>2</sup>, Masahiro Kihara<sup>5</sup>

**1** Research Institute for Health Sciences, Chiang Mai University, Chiang Mai, Thailand, **2** Global Health Interdisciplinary Unit, Center for the Promotion of Interdisciplinary Education and Research, Kyoto University, Kyoto, Japan, **3** Sankampang Hospital, Chiang Mai, Thailand, **4** Department of Community Medicine, Faculty of Medicine, Chiang Mai University, Chiang Mai, Thailand, **5** Department of Health Informatics, Kyoto University School of Public Health, Kyoto, Japan, **6** Center for Medical Education, Graduate School of Medicine, Kyoto University, Kyoto, Japan

\* [patoumus@yahoo.fr](mailto:patoumus@yahoo.fr)

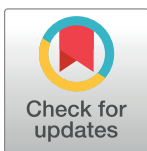

## OPEN ACCESS

**Citation:** Tangmunkongvorakul A, Musumari PM, Tsubohara Y, Ayood P, Srithanaviboonchai K, Techasrivichien T, et al. (2020) Factors associated with smartphone addiction: A comparative study between Japanese and Thai high school students. *PLoS ONE* 15(9): e0238459. <https://doi.org/10.1371/journal.pone.0238459>

**Editor:** Siyan Yi, National University of Singapore, SINGAPORE

**Received:** January 29, 2020

**Accepted:** August 17, 2020

**Published:** September 8, 2020

**Copyright:** © 2020 Tangmunkongvorakul et al. This is an open access article distributed under the terms of the [Creative Commons Attribution License](https://creativecommons.org/licenses/by/4.0/), which permits unrestricted use, distribution, and reproduction in any medium, provided the original author and source are credited.

**Data Availability Statement:** The dataset is uploaded as a supplemental file.

**Funding:** The Thai survey was funded by Chiang Mai University and the survey in Japan was funded by the National High School Parent-Teacher Association of Japan. The funders had no role in study design, data collection and analysis, decision to publish, or preparation of the manuscript.

## Abstract

### Background

Smartphone addiction is a growing social problem with adverse health outcomes. There are few comparative studies in Asia that examine factors associated with smartphone addiction. The current study aimed to address this research gap by presenting a comparative analysis of factors associated with smartphone addiction in Japan and Thailand, two countries heterogeneous in both their level of economic development and culture.

### Methods

Participant data were collected using two population-based surveys. Participants were high school students in grade 11, aged 16–17 years old, and were selected using quota sampling in Japan in 2014 and random sampling in Thailand in 2016. The outcome of interest was smartphone addiction, measured using a modified version of the Young Diagnostic Questionnaire for Internet Addiction. Multiple logistic regression analysis was performed to determine factors associated with smartphone addiction (gender; nationality; family connectedness; and average time spent on smartphone per day).

### Results

This study included a total of 7694 students, 6585 students from Japan and 1109 students from Thailand. The prevalence of smartphone addiction was 35.9% among Thai students and 12% among Japanese students. Thai students were more likely to have smartphone addiction than Japanese students (AOR 2.76; 95% CI: 2.37–3.30). Being female was associated with increased odds of smartphone addiction in both Japanese (AOR 1.53; 95% CI: 1.32–1.78) and Thai students (AOR 1.34; 95% CI: 1.01–1.78). The parental connectedness variables “my parents noticed when I was unhappy” (AOR 0.77; 95% CI: 0.62–0.96) and

**Competing interests:** The authors have declared that no competing interests exist.

“my parents noticed when I did something good” (AOR 0.78, 95% CI: 0.61–0.99) were associated with lower odds of smartphone addiction among Japanese students.

## Conclusion

Smartphone addiction was more prevalent among Thai adolescents than Japanese adolescents, and more prevalent among females than males in both countries. Interventions for reducing smartphone addiction should take into account both context and gender, and should leverage the protective effect of parental connectedness.

## Introduction

In just a few decades, smartphones have become ubiquitous devices in both developed and developing settings, and across populations of different age strata. The rapid adoption of these devices have been attributed to their portability and ability to provide a variety of functions such as Internet browsing, access to email, easy access to social media networks, real-time broadcast, camera, navigation system, and multimedia players. The global number of smartphone users has increased from 1.57 billion in 2014 to a current estimate of 2.71 billion [1].

Although smartphones have transformed lives in positive ways, such as increased productivity and social networking, there is growing evidence indicating that people overuse their phones in ways that interfere with their daily lives and mental health [2, 3]. Various terms have been used to describe different patterns of smartphone overuse, such as “smartphone addiction”, “problematic smartphone use”, and “excessive smartphone use” [4]. This study will refer to this phenomenon as smartphone addiction. Smartphone addiction has rapidly grown to become a major social and health problem, particularly among adolescents and young people. A recent systematic review examined the prevalence of problematic smartphone use, including smartphone addiction, and found a prevalence between 10% and 30%, with a median of 23.3% [5]. In Asia, the geographic region of this study, the prevalence of smartphone addiction and other types of smartphone overuse among adolescents and young people varied across studies and countries. For example, studies have documented prevalence ranging from 13.5% to 36% in South Korea [6–12], 4.05% to 29.8% in China [13–23], 15.5% to 82% in India [24–27], and 62.6% in Filipino adolescents [28]. In Japan and Thailand, the focus of the current research, very few studies have reported on the prevalence of smartphone addiction. One Thai study found that 45.8% of students aged 18–24 years in Chiang Mai had excessive smartphone use [29], while in Japan, Tateno and colleagues documented a smartphone addiction prevalence of 22.8% among males and 28% among female college students (mean age 19 years  $\pm$ 1.3) [30]. In Western countries, the prevalence of smartphone addiction and/or other problematic smartphone use ranged from 16.9% to 43.3% [31, 32].

Many factors are associated with smartphone addiction and other patterns of smartphone overuse among adolescents and young people in Asia. These include for example, depression and anxiety [7, 8, 14, 19, 20, 33], loneliness and shyness [13], low psychological well-being [29], low self-esteem [34], substance use (alcohol use and smoking) [19, 33, 35], poor sleep quality [12, 14, 20], low academic performance [9, 27, 35], being female [9, 11, 33, 35–38], having a poor relationship with parents [9], less involvement at school and less satisfaction with school life [9], and negative parenting style [39].

A recent cross-cultural study comparing smartphone use between Chinese and British students found that Chinese students were more likely than British students to have problematic

smartphone use [32]. Asian countries are heterogeneous in their level of economic development and culture, which can potentially influence patterns of smartphone use. However, there are few bi-national or multi-country studies comparing the prevalence of and factors associated with smartphone addiction among adolescents in Asia despite the growing research related to smartphone use in the region. To address this research gap, the present study explored the prevalence of smartphone addiction and factors associated with smartphone addiction among Japanese and Thai in-school adolescents.

## Materials and methods

### Participants

The present study included participant data from two of our population-based surveys conducted in Japan and Thailand. The sample from Japan was obtained from the 2014 Well-being of Youth in Social Happiness (WYSH) survey. The survey was part of the WYSH Project which was designed to prevent HIV and other sexually transmitted infections, and to promote the well-being of youth in Japan. The 2014 WYSH survey targeted male and female second year public high school students (grade 11), aged 16–17 years old. The participants were recruited using quota sampling. This sampling method provided the most cost-effective means to obtain a representative sample of second year students in Japan based on feasibility and availability of resources. Quotas were established based on the nine geographic regions of Japan (Hokkaido; Tohoku; Kanto; Tokyo; Hokushinetsu; Tokai; Kinki; Kyushu; Chushikoku) and types of schools (standard or specialized/comprehensive). We selected five schools in each of region (consisting of three standard schools and two specialized or comprehensive high schools), resulting in a total of 45 schools from all over Japan. In calculating sample size, Internet addiction was used as a proxy for smartphone addiction because very little data on smartphone addiction existed at the time the study was conducted. Assuming an Internet addiction prevalence of 6% among boys and 10% among girls in middle schools in Japan [40], a total sample size of 1542 (771 per group) was necessary to detect a 4% difference in the prevalence of Internet addiction between genders with a statistical significance at  $\alpha = 0.005$  and power of 80%. To ensure there was enough precision for multiple logistic regression analyses (15 outcomes for a maximum of 15 variables in the model; the rule of thumb being at least 10 outcomes were needed for every independent variable in the multiple logistic regression model [41]), subgroup analyses by gender or region (doubling the sample size), and possible non-response (15% of the sample), we decided to recruit 7200 students selected from four second year classes, each with at least 40 students from each school (160 students per school for the 45 schools included in this study).

The sample from Thailand was obtained from the Thai version of the WYSH study, which was conducted in 2016. The Thai survey included similar items to those employed in the 2014 WYSH survey in Japan. The survey similarly targeted male and female second year high school students (grade 11), aged 16–17 years old. Unlike the Japanese study, the sample for the Thai study consisted of students from only one geographic location, namely Chiang Mai, Northern Thailand. Researchers in Thailand did not have the resources to conduct a national study and therefore focused recruitment in an urban area of Chiang Mai province. The participants were recruited from all the fifteen schools located in Chiang Mai City. All participants from a set of randomly selected classrooms in each of the schools were invited to participate in the study. We estimated a required sample size of approximately 400 male and female students each based on Krejcie and Morgan's formula [42]. The number is based on an estimated population size of 1696 male and 2283 female grade 11 students in Chiang Mai and factoring in a 5% margin of error, the proportion of the population with a given attribute was set at 0.5 (because this

would provide the maximum sample size). The chi-square value for one degree of freedom was set at a 95% confidence interval (3.841).

### Data collection and variables

Data were collected using a paper-based self-administered structured questionnaire. The following were variables in the present study: smartphone addiction, other smartphone and social media-related variables, family connectedness, and socio-demographic variables. The Japanese and Thai questionnaires were each pilot tested among 15 and 20 students to assess readability and understanding. The wording of the questionnaire was modified accordingly. The survey in Japan was conducted either in students' homerooms or other locations as designated by school authorities in Japan and in students' classrooms in Thailand.

**Smartphone addiction.** We adapted the Young Diagnostic Questionnaire for Internet Addiction by replacing the variable "Internet use" with "smartphone use," since the original scale used "Internet use" to denote all types of online activity [43]. The scale consisted of eight items, scored as 0 ("no") and 1 ("yes"). Sample items included: i) you feel preoccupied with your smartphone; ii) you feel the need to use your smartphone for an increasing amount of time in order to achieve satisfaction; iii) you have repeatedly made unsuccessful efforts to control, cut back, or stop smartphone use; and iv) you spend more time on your smartphone than originally intended. The total possible score ranged from 0 to 8. Participants who answered "yes" to five or more of the criteria were classified as addicted smartphone users and the remainder were classified as non-addicted smartphone users [43]. The Young Diagnostic Questionnaire for Internet Addiction has been validated in both Japan and Thailand [44, 45]. The overall Cronbach's alpha of the original Young Diagnostic Questionnaire for Internet Addiction based on a systematic review of 11 studies comprising a total of 6821 participants was 0.889 [46]. The modified questionnaires in our study had a Cronbach's alpha of 0.76 for the Japanese sample, 0.70 for the Thai sample, and 0.77 for the pooled sample.

**Other smartphone and social media-related variables.** These variables included: i) ownership of a smartphone; ii) time spent on smartphone per day; iii) use of social networking sites; and iv) restriction of smartphone use by parents.

**Family connectedness.** A range of variables related to family connectedness was collected. These included: (i) frequency of dining with family in the past week; (ii) frequency of talking with parents; (iii) satisfaction with relationship with father; (iv) satisfaction with relationship with mother; (v) perceived love and care from parents; and (vi) two parental involvement variables ("How often do your parents notice when you have a problem/are not happy?"; "How often do your parents notice when you do something good?")

**Socio-demographic variables.** The main socio-demographic variables included gender (female and male) and nationality (Japanese and Thai).

### Ethics statement

In Japan, the study was approved by the National High School PTA (Parent-Teacher Association), while the Human Experimentation Committee at the Research Institute for Health Sciences, Chiang Mai University (Certificate of Ethical Clearance No. 48/2016) provided ethical clearance in Thailand. All participants received information about the study objectives, roles of participants, their right to choose to answer or not answer any question, confidentiality, and how study findings would be presented. Participants and legal guardians provided written informed consent prior to participating in the study.

## Statistical analyses

The analysis was performed using SPSS 17 (PASW) for Windows (SPSS Inc., Chicago, Illinois, USA). Bivariate analysis was conducted using Chi-square tests and unadjusted logistic regression to explore factors associated with smartphone addiction (gender; nationality; family connectedness; and average time spent on smartphone per day). Variables that were statistically significant at  $p < 0.05$  in the bivariate analysis were included in the multiple logistic regression analysis. The analysis was conducted separately for the Japanese, Thai, and then pooled samples. There was no evidence of multicollinearity.

## Results

### Characteristics of participants and smartphone use

This study included a total of 7694 students, 6585 from Japan and 1109 from Thailand. There were slightly more females than males (55.9% vs 44.1%) in the Thai sample, while the proportion of Japanese male and female students were almost equal. The proportion of smartphone ownership was very high in both populations, 95% and 97.5% in Japanese and Thai students respectively. The same trend was noted for social media use whereby 97.7% of Japanese students and 99.6% of Thai students reported having previously used social media. Both the proportion of smartphone ownership and social media use was significantly higher in Thai students than in Japanese students. Nearly half of Thai students (45.3%) used smartphones more than five hours per day with far fewer Japanese students doing so (12.8%). With regards to parental control over students' smartphone usage, Japanese parents mostly relied on filtering programs (Japanese: 33.6%, Thai: 0.8%) and limitations imposed by monthly packages (Japanese: 18.1%, Thai: 9.6%), while Thai parents tended to impose restrictions on usage time (Japanese: 5.1%, Thai: 13.9%). In total, 35.9% of Thai students and 12% of Japanese students were categorized as having a smartphone addiction (Table 1).

### Family connectedness

More Thai students than Japanese reported engaging in activities indicative of family connectedness such as dining with family every day, always talking to parents, being very satisfied with their relationship with both parents, and feeling love and care from parents. Alternately, Japanese students were more likely than Thai students to have parents that noticed when they were unhappy or did something good (Table 2).

### Factors associated with smartphone addiction

Table 3 presents crude and adjusted associations between the independent variables (nationality; gender; and connectedness related variables) and smartphone addiction from the pooled sample, and in both Japanese and Thai students separately. In the multivariable analyses, we found that Thai students were almost 2.7 times more likely to be addicted to smartphones than Japanese students (AOR 2.79; 95% CI: 2.37–3.30). Being female had increased odds of smartphone addiction among both among Japanese (AOR 1.53; 95% CI: 1.32–1.78) and Thai students (AOR 1.34; 95% CI: 1.01–1.78). In both Japanese and Thai students, increases in daily average smartphone usage were associated with increased odds of smartphone addiction in a dose-response fashion; 2 to 4 hours [Japanese (AOR 1.69; 95% CI: 1.34–2.14); Thai (AOR 2.14; 95% CI: 1.61–2.85)] and 5 hours or more [Japanese (AOR 5.60; 95% CI: 3.26–9.64); Thai (AOR 5.30; 95% CI: 2.95–9.52)]. Lastly, Japanese students that were less likely to have smartphone addictions were those with parents who regularly noticed when they were unhappy (AOR 0.77; 95% CI: 0.62–0.96), parents who noticed when they did something good (AOR

**Table 1. Smartphone use in Japanese and Thai high school students.**

|                                                                    | Japanese (6585) | Thai (1109) | <i>p</i> -value |
|--------------------------------------------------------------------|-----------------|-------------|-----------------|
|                                                                    | n (%)           | n (%)       |                 |
| <b>Gender</b>                                                      |                 |             | < 0.001         |
| Female                                                             | 3327 (50.5)     | 620 (55.9)  |                 |
| Male                                                               | 3258 (49.5)     | 489 (44.1)  |                 |
| <b>Own a smartphone</b>                                            | 6245 (95.0)     | 1081 (97.5) | < 0.001         |
| <b>Have used social media</b>                                      | 6379 (97.7)     | 1105 (99.6) | < 0.001         |
| <b>Smartphone usage per day</b>                                    |                 |             | < 0.001         |
| One hour or less                                                   | 2068 (31.5)     | 136 (12.4)  |                 |
| 2–4 hours                                                          | 3657 (55.7)     | 466 (42.4)  |                 |
| 5 hours and more                                                   | 842 (12.8)      | 498 (45.3)  |                 |
| <b>Parental measures to restrict smartphone use</b>                |                 |             |                 |
| Limit time usage                                                   | 331 (5.1)       | 154 (13.9)  | < 0.001         |
| Limit through monthly package                                      | 1178 (18.1)     | 106 (9.6)   | < 0.001         |
| Set up filtering program                                           | 2189 (33.6)     | 9 (0.8)     | < 0.001         |
| <b>Smartphone addiction measures</b>                               |                 |             |                 |
| I have been preoccupied with using my smartphone.                  | 2992 (45.8)     | 674 (61.9)  | < 0.001         |
| I've extend usage time for my satisfaction.                        | 2093 (32.1)     | 626 (57.4)  | < 0.001         |
| I've tried to reduce or quit using my smartphone but failed.       | 1616 (24.8)     | 528 (48.5)  | < 0.001         |
| I felt unhappy when I tried to reduce or quit using my smartphone. | 806 (12.4)      | 316 (29.0)  | < 0.001         |
| I've spent more time using my smartphone than I intended.          | 2465 (37.9)     | 897 (82.1)  | < 0.001         |
| I've had relationship problems due to smartphone use.              | 420 (6.1)       | 332 (30.3)  | < 0.001         |
| I've lied to people to hide my smartphone use.                     | 620 (9.5)       | 180 (16.5)  | < 0.001         |
| I've used my smartphone to escape from problems or feelings        | 1252 (19.2)     | 507 (46.9)  | < 0.001         |
| <b>Smartphone addiction*</b>                                       | 776 (12.0)      | 382 (35.9)  | < 0.001         |

<sup>a</sup> *p*-values were calculated by  $\chi^2$  tests.

\*: "yes" to five or more of the above 8 items of smartphone addiction

<https://doi.org/10.1371/journal.pone.0238459.t001>

0.78; 95% CI: 0.61–0.99), and felt love and care from their parents (AOR 0.61; 95% CI: 0.44–0.84) (Table 3).

## Discussion

This study is the first to present a comparison of smartphone addiction prevalence and associated factors in two Asian countries of differing economic development and socio-cultural characteristics. Our findings are consistent with results from previous research showing high prevalence of smartphone ownership among high school students in developed and developing settings [9, 31, 35, 47].

We found a higher prevalence of smartphone addiction among Thai students than among Japanese high school students, with Thai students being almost 3 times more likely than Japanese students to be addicted to smartphones. Although this finding might be real and reflect a true difference in the prevalence of smartphone addiction between the two countries, it is important to underscore other factors that might explain the documented difference in the prevalence of smartphone addiction. Firstly, there is a time lag of 2 years between the two surveys. The prevalence of smartphone use which is known to be time-sensitive (generally increasing through time) could possibly explain the higher prevalence of smartphone addiction among Thai students. Secondly, while the survey in Japan was conducted almost country

Table 2. Family connectedness of Japanese and Thai high school students.

|                                                                | Japanese (6585) | Thai (1109) | <i>p</i> -value |
|----------------------------------------------------------------|-----------------|-------------|-----------------|
|                                                                | n (%)           | n (%)       |                 |
| <b>Frequency of dining with family in the past week</b>        |                 |             | < 0.001         |
| 7 days                                                         | 2302 (35.4)     | 455 (45.1)  |                 |
| 5–6 days                                                       | 647 (10.0)      | 107 (10.6)  |                 |
| 3–4 days                                                       | 1025 (15.8)     | 188 (18.6)  |                 |
| 1–2 days                                                       | 1509 (23.2)     | 178 (17.6)  |                 |
| Never                                                          | 1019 (15.7)     | 81 (8.0)    |                 |
| <b>I talk to my parents</b>                                    |                 |             | < 0.001         |
| Always                                                         | 2828 (43.2)     | 614 (56.1)  |                 |
| Often                                                          | 1713 (26.2)     | 274 (25.0)  |                 |
| Sometimes                                                      | 1472 (22.5)     | 104 (9.5)   |                 |
| Rarely                                                         | 454 (6.9)       | 96 (8.8)    |                 |
| Never                                                          | 82 (1.3)        | 7 (0.6)     |                 |
| <b>My parents notice when I have a problem or feel unhappy</b> |                 |             | < 0.001         |
| Regularly                                                      | 3632 (66.8)     | 627 (59.9)  |                 |
| Rarely                                                         | 1367 (25.2)     | 312 (29.8)  |                 |
| Never                                                          | 435 (8.0)       | 107 (10.2)  |                 |
| <b>My parents notice when I do something good</b>              |                 |             | < 0.001         |
| Regularly                                                      | 4705 (80.6)     | 769 (73.0)  |                 |
| Rarely                                                         | 945 (16.2)      | 225 (21.3)  |                 |
| Never                                                          | 187 (3.2)       | 60 (5.7)    |                 |
| <b>Satisfaction with relationship with mother</b>              |                 |             | < 0.001         |
| Very satisfied                                                 | 2243 (35.0)     | 655 (60.1)  |                 |
| Satisfied                                                      | 2797 (43.6)     | 313 (28.7)  |                 |
| Neither satisfied nor unsatisfied                              | 1027 (16.0)     | 90 (8.3)    |                 |
| Dissatisfied                                                   | 228 (3.6)       | 29 (2.7)    |                 |
| Very Dissatisfied                                              | 113 (1.8)       | 2 (0.0)     |                 |
| <b>Satisfaction with relationship with father</b>              |                 |             | < 0.001         |
| Very satisfied very much                                       | 1549 (26.0)     | 494 (47.2)  |                 |
| Satisfied                                                      | 2407 (40.4)     | 354 (33.8)  |                 |
| Neither satisfied nor unsatisfied                              | 1233 (20.7)     | 154 (14.7)  |                 |
| Dissatisfied                                                   | 473 (7.9)       | 35 (3.3)    |                 |
| Very Dissatisfied                                              | 289 (4.9)       | 10 (1.0)    |                 |
| <b>I feel loved and cared for by my parents</b>                |                 |             | < 0.001         |
| Always                                                         | 2555 (39.3)     | 706 (64.1)  |                 |
| Often                                                          | 1961 (30.1)     | 253 (23.0)  |                 |
| Sometimes                                                      | 1668 (25.6)     | 113 (10.3)  |                 |
| Rarely                                                         | 269 (4.1)       | 20 (1.8)    |                 |
| Never                                                          | 56 (0.9)        | 9 (0.8)     |                 |

<sup>a</sup> *p*-values were calculated by  $\chi^2$  tests

<https://doi.org/10.1371/journal.pone.0238459.t002>

wide, the Thailand survey was limited to Chiang Mai, a Northern province in Thailand. Thirdly, the difference could also be attributed to differing levels of parental restriction on smartphone usage between the two countries. As observed in this study, a higher proportion of Japanese parents employed restrictive measures including filtering programs and limited monthly packages for Internet use than Thai parents.

**Table 3. Smart phone addiction and family connectedness among Japanese and Thai high school students.**

|                                                               | Total         |                     |                     | Japanese students   |                     | Thai students       |                    |
|---------------------------------------------------------------|---------------|---------------------|---------------------|---------------------|---------------------|---------------------|--------------------|
|                                                               | n (%)         | COR (95% CI)        | AOR (95% CI)        | COR (95% CI)        | AOR (95% CI)        | COR (95% CI)        | AOR (95% CI)       |
| <b>Nationality</b>                                            |               |                     |                     |                     |                     |                     |                    |
| Thai                                                          | 382<br>(35.9) | 4.13 (3.57–4.78)*** | 2.79 (2.37–3.30)*** | -                   | -                   | -                   | -                  |
| Japan                                                         | 776<br>(12.0) | 1                   | 1                   |                     |                     |                     |                    |
| <b>Gender</b>                                                 |               |                     |                     |                     |                     |                     |                    |
| Female                                                        | 711<br>(18.3) | 1.61 (1.42–1.83)*** | 1.51 (1.31–1.75)*** | 1.53 (1.32–1.78)*** | 1.63 (1.35–1.97)*** | 1.67 (1.29–2.16)*** | 1.34 (1.01–1.78)*  |
| Male                                                          | 447<br>(12.2) | 1                   | 1                   | 1                   | 1                   | 1                   |                    |
| <i>Family connectedness</i>                                   |               |                     |                     |                     |                     |                     |                    |
| <b>Frequency of dining with family in the past week</b>       |               |                     |                     |                     |                     |                     |                    |
| Every day                                                     | 417<br>(15.5) | 1.05 (0.92–1.19)    | a                   | 1.03 (0.88–1.20)    | a                   | 0.78 (0.60–1.02)    | a                  |
| Not every day                                                 | 697<br>(14.9) | 1                   |                     | 1                   |                     | 1                   |                    |
| <b>I talk to my parents</b>                                   |               |                     |                     |                     |                     |                     |                    |
| Always                                                        | 501<br>(14.8) | 0.93 (0.82–1.05)    | a                   | 0.83 (0.71–0.96)*   | 0.82 (0.67–1.00)    | 0.75 (0.58–0.96)*   | 0.80 (0.60–1.08)   |
| Not always                                                    | 650<br>(15.8) | 1                   |                     | 1                   | 1                   | 1                   |                    |
| <b>My parents noticed when I have a problem/ feel unhappy</b> |               |                     |                     |                     |                     |                     |                    |
| Regularly                                                     | 613<br>(14.6) | 0.67 (0.59–0.77)*** | 0.83 (0.70–0.98)*   | 0.62 (0.53–0.73)*** | 0.77 (0.62–0.96)*   | 0.98 (0.75–1.27)    | a                  |
| Not regularly or never                                        | 442<br>(20.3) | 1                   | 1                   | 1                   | 1                   | 1                   |                    |
| <b>My parents noticed when I do something good</b>            |               |                     |                     |                     |                     |                     |                    |
| Regularly                                                     | 766<br>(14.2) | 0.58 (0.50–0.67)*** | 0.70 (0.58–0.84)*** | 0.56 (0.47–0.68)*** | 0.78 (0.61–0.99)*   | 0.79 (0.59–1.05)    | a                  |
| Not regularly or never                                        | 311<br>(22.3) | 1                   | 1                   | 1                   | 1                   | 1                   |                    |
| <b>Satisfaction with relationship with mother</b>             |               |                     |                     |                     |                     |                     |                    |
| Very satisfied                                                | 411<br>(15.5) | 1.02 (0.90–1.16)    | a                   | 0.79 (0.67–0.93)**  | 0.92 (0.72–1.19)    | 0.76 (0.59–0.98)*   | 1.06 (0.74–1.52)   |
| Other                                                         | 687<br>(15.2) | 1                   |                     | 1                   | 1                   | 1                   | 1                  |
| <b>Satisfaction with relationship with father</b>             |               |                     |                     |                     |                     |                     |                    |
| Very satisfied                                                | 311<br>(15.5) | 1.03 (0.89–1.19)    | a                   | 0.83 (0.68–0.99)*** | 0.92 (0.72–1.19)    | 0.73 (0.56–0.94)*   | 0.85 (0.61–1.20)   |
| Other                                                         | 736<br>(15.1) | 1                   |                     | 1                   |                     | 1                   | 1                  |
| <b>I've feel loved and cared for by my parents</b>            |               |                     |                     |                     |                     |                     |                    |
| Always                                                        | 496<br>(15.5) | 1.02 (0.90–1.16)    | a                   | 0.88 (0.75–1.03)    | a                   | 0.57 (0.44–0.74)*** | 0.61 (0.44–0.84)** |
| Not always                                                    | 652<br>(15.3) | 1                   |                     | 1                   |                     | 1                   | 1                  |
| <b>Smartphone usage per day (average/day)</b>                 |               |                     |                     |                     |                     |                     |                    |

(Continued)



Table 3. (Continued)

|                  | Total         |                         |                         | Japanese students       |                         | Thai students           |                         |
|------------------|---------------|-------------------------|-------------------------|-------------------------|-------------------------|-------------------------|-------------------------|
|                  | n (%)         | COR (95% CI)            | AOR (95% CI)            | COR (95% CI)            | AOR (95% CI)            | COR (95% CI)            | AOR (95% CI)            |
| 5 hours and more | 387<br>(29.4) | 5.45 (4.45–<br>6.67)*** | 3.54 (2.81–<br>4.46)*** | 3.31 (2.59–<br>4.23)*** | 3.49 (2.62–<br>4.66)*** | 5.60 (3.26–<br>9.64)*** | 5.30 (2.95–<br>9.52)*** |
| 2–4 hours        | 613<br>(15.0) | 2.36 (2.04–<br>2.73)*** | 1.74 (1.47–<br>2.06)*** | 1.57 (1.29–<br>1.91)*** | 1.69 (1.34–<br>2.14)*** | 2.09 (1.60–<br>2.74)*** | 2.14 (1.61–<br>2.85)*** |
| One hour or less | 152 (7.1)     | 1                       | 1                       | 1                       | 1                       | 1                       | 1                       |

\* significant *p*-values < 0.05

\*\* significant *p*-values < 0.01

\*\*\* significant *p*-values < 0.001; COR: Crude Odds Ratio; AOR: Adjusted Odds Ratio. The following covariates were included in the models based on their statistical significance level (*p*-value < 0.05) in the bivariate analysis covariates: nationality; gender; frequency of dining with family in the past week; frequency of talking with parents; “How often your parents notice when you have a problem/feel unhappy”; Frequency with which your parents let you know that you did something good”; satisfaction with relationship with mother; satisfaction with relationship with father; perceived love and care from parents; and smartphone usage. a: not included in multivariable analysis

<https://doi.org/10.1371/journal.pone.0238459.t003>

In this study, female students were at higher risk of smartphone addiction than male students. This is consistent with previous studies on smartphone addiction and other forms of smartphone overuse among adolescents and young people [9, 11, 33, 35–38, 48]. The reason for this gender difference remains unclear; however, previous studies have shown different patterns of smartphone usage between males and females, with females tending to show greater use of smartphones and more addiction to social media (almost all smartphones come equipped with social media apps). However, males spend more time gaming (mostly on laptops or personal computers) and are more addicted to gaming than females [14, 48]. Other studies provide contradictory findings regarding gender differences. For example, Buctot et al. found a higher prevalence of smartphone addiction in adolescent males compared to females in the Philippines [28]. Similarly, males were found to be more prone to smartphone [49] and Internet addiction [50, 51] compared to females.

Overall, Thai students appeared to be more connected to family than Japanese students in this study. A higher prevalence of Thai students reported dining with their family every day; always talking to their parents; being very satisfied with relationships with both parents; and always feeling love and care from both parents. Evidence from Japan suggests that the proportion of children eating alone during mealtimes began to increase in the early nineties, and was estimated at 30% among third year middle school students [52]. This increased rate of children eating alone has reduced opportunities for family conversation, and has possibly weakened family connectedness in Japan. However, parental involvement was more pronounced in Japanese high students than in Thai students. Parental involvement was also associated with smartphone addiction but only among Japanese high school students; students with parents who regularly noticed when they had problems or when they did something good were less likely to have smartphone addiction. Similarly, perception of parental love and care was associated with lower likelihood of smartphone addiction in Japanese students. While parental involvement was protective against smartphone addiction among the Japanese, the overall domain of family connectedness was a better indicator, and the rate of smartphone addiction was higher in Thai adolescents.

This study has several limitations that are worth considering. First, the cross-sectional design precludes drawing causal inferences among study variables. Second, the limited number of variables included in the models mean that we might have missed important variables associated with smartphone addiction in these populations due to the limited socio-

demographic data collected. Factors such as depression and anxiety [7, 8, 14, 19, 20, 33], substance use (alcohol use and smoking) [19, 33, 35], self-esteem [34], poor sleep quality [12, 14, 20], and low academic performance [7, 9, 27] have been associated with smartphone addiction. Third, the specific context of the two research teams made it difficult to collect data using the same criteria. The survey in Japan employed quota sampling and collected data on a national level, whereas the sample in Thailand was collected from a single province (Chiang Mai) due to limited logistical capacity, resulting in different sample sizes. Also, the sample in Japan was obtained in 2014, while data collection in Thailand took place in 2016. These differences might influence the results of this study. Fourth, there is the possibility of recall bias for the measurement of smartphone usage. Lastly, we did not use a validated scale to capture family connectedness. It is unclear to what extent this might affect the results of the current study. Despite the above limitations, this study remains the first of its kind to provide a comparative analysis of smartphone addiction between high school students in Japan and Thailand.

## Conclusion

Although there was high smartphone ownership in both Japanese and Thai adolescents, smartphone addiction was more prevalent among Thai adolescents. Females in both countries were more likely than males to have a smartphone addiction. Parental involvement appeared to have a protective effect against smartphone addiction, particularly among Japanese adolescents. Our results suggest that interventions for reducing smartphone addiction should take into account both context and gender, and should leverage the protective effect of parental involvement. Future students can build upon this study by clarifying and validating the results.

## Supporting information

**S1 Data.**  
(SAV)

## Acknowledgments

We thank all staff at Chiang Mai University for their support and all participants for their cooperation in providing the information for this study. We also thank the Kyoto University Global Health Interdisciplinary Unit for supporting this work.

## Author Contributions

**Conceptualization:** Arunrat Tangmunkongvorakul, Patou Masika Musumari, Kriengkrai Srithanaviboonchai, Teeranee Techasrivichien, S. Pilar Suguimoto, Masako Ono-Kihara, Masahiro Kihara.

**Data curation:** Yukie Tsubohara, Pisittawoot Ayood.

**Formal analysis:** Arunrat Tangmunkongvorakul, Yukie Tsubohara, Pisittawoot Ayood.

**Funding acquisition:** Arunrat Tangmunkongvorakul, Masako Ono-Kihara.

**Methodology:** Arunrat Tangmunkongvorakul, Patou Masika Musumari, Kriengkrai Srithanaviboonchai, Masako Ono-Kihara, Masahiro Kihara.

**Project administration:** Arunrat Tangmunkongvorakul, Yukie Tsubohara, Pisittawoot Ayood.

**Supervision:** Patou Masika Musumari, Kriengkrai Srithanaviboonchai, Masako Ono-Kihara, Masahiro Kihara.

**Validation:** Masako Ono-Kihara.

**Writing – original draft:** Arunrat Tangmunkongvorakul, Patou Masika Musumari, Yukie Tsubohara, Pisittawoot Ayood.

**Writing – review & editing:** Arunrat Tangmunkongvorakul, Patou Masika Musumari, Kriengkrai Srithanaviboonchai, Teeranee Techasrivichien, S. Pilar Sugumimoto.

## References

1. Statista. Number of monthly active mobile social media users in Asia Pacific in September 2016 and September 2017, by country. Retrieved from July 29, 2018 from <https://www.statista.com/statistics/295643/mobile-social-media-mau-asia-pacific-countries/>.
2. Cheever NA, Rosen LD, Carrier LM, Chavez A. Out of sight is not out of mind: The impact of restricting wireless mobile device use on anxiety levels among low, moderate and high users. *Computers in Human Behavior*. 2014; 37:290–7. <https://doi.org/10.1016/j.chb.2014.05.002>.
3. Clayton RB, Leshner G, Almond A. The Extended iSelf: The Impact of iPhone Separation on Cognition, Emotion, and Physiology. *Journal of Computer-Mediated Communication*. 2015; 20(2):119–35. <https://doi.org/10.1111/jcc4.12109>
4. Elhai JD, Dvorak RD, Levine JC, Hall BJ. Problematic smartphone use: A conceptual overview and systematic review of relations with anxiety and depression psychopathology. *Journal of affective disorders*. 2017; 207:251–9. Epub 2016/10/14. <https://doi.org/10.1016/j.jad.2016.08.030> PMID: 27736736.
5. Sohn S, Rees P, Wildridge B, Kalk NJ, Carter B. Prevalence of problematic smartphone usage and associated mental health outcomes amongst children and young people: a systematic review, meta-analysis and GRADE of the evidence. *BMC Psychiatry*. 2019; 19(1):356. <https://doi.org/10.1186/s12888-019-2350-x> PMID: 31779637
6. Jo H-s, Na E, Kim D-J. The relationship between smartphone addiction predisposition and impulsivity among Korean smartphone users. *Addiction Research & Theory*. 2018; 26(1):77–84. <https://doi.org/10.1080/16066359.2017.1312356>
7. Kim HJ, Min JY, Kim HJ, Min KB. Association between psychological and self-assessed health status and smartphone overuse among Korean college students. *Journal of mental health (Abingdon, England)*. 2019; 28(1):11–6. Epub 2017/09/05. <https://doi.org/10.1080/09638237.2017.1370641> PMID: 28868959.
8. Kwon YS, Paek KS. The influence of smartphone addiction on depression and communication competence among college students. *Indian J Sci Technol* 2016; 9(41):1–8.
9. Lee C, Lee S-J. Prevalence and predictors of smartphone addiction proneness among Korean adolescents. *Children and Youth Services Review*. 2017; 77(C):10–7.
10. Lee H, Ahn H, Nguyen TG, Choi S-W, Kim DJ. Comparing the Self-Report and Measured Smartphone Usage of College Students: A Pilot Study. *Psychiatry investigation*. 2017; 14(2):198–204. Epub 03/06. <https://doi.org/10.4306/pi.2017.14.2.198> PMID: 28326119.
11. Lee HJ, Kim JW, Choi TY. Risk Factors for Smartphone Addiction in Korean Adolescents: Smartphone Use Patterns. *Journal of Korean Medical Science*. 2017; 32:1674–9. <https://doi.org/10.3346/jkms.2017.32.10.1674> PMID: 28875613
12. Lee JE, Jang SI, Ju YJ, Kim W, Lee HJ, Park EC. Relationship between Mobile Phone Addiction and the Incidence of Poor and Short Sleep among Korean Adolescents: a Longitudinal Study of the Korean Children & Youth Panel Survey. *J Korean Med Sci*. 2017; 32(7):1166–72. Epub 2017/06/06. <https://doi.org/10.3346/jkms.2017.32.7.1166> PMID: 28581275; PubMed Central PMCID: PMC5461322.
13. Bian M, Leung L. Linking Loneliness, Shyness, Smartphone Addiction Symptoms, and Patterns of Smartphone Use to Social Capital. *Social Science Computer Review*. 2014; 33(1):61–79. <https://doi.org/10.1177/0894439314528779>
14. Chen B, Liu F, Ding S, Ying X, Wang L, Wen Y. Gender differences in factors associated with smartphone addiction: a cross-sectional study among medical college students. *BMC Psychiatry*. 2017; 17(1):341–. <https://doi.org/10.1186/s12888-017-1503-z> PMID: 29017482.
15. Chen L, Yan Z, Tang W, Yang F, Xie X, He J. Mobile phone addiction levels and negative emotions among Chinese young adults: The mediating role of interpersonal problems. *Comput Hum Behav*. 2016; 55:856–66.
16. Jiang Z, Shi M. Prevalence and co-occurrence of compulsive buying, problematic Internet and mobile phone use in college students in Yantai, China: relevance of self-traits. *BMC public health*. 2016; 16

- (1):1211. Epub 2016/12/03. <https://doi.org/10.1186/s12889-016-3884-1> PMID: 27905905; PubMed Central PMCID: PMC5131526.
17. Li M, Lu L. The Influence of Mobile Phone Addiction on Left-behind Middle School Students Sleep Quality: the Mediator Role of Loneliness. *Revista Argentina De Clinica Psicologica*. 2017.
  18. Long J, Liu TQ, Liao YH, Qi C, He HY, Chen SB, et al. Prevalence and correlates of problematic smartphone use in a large random sample of Chinese undergraduates. *BMC Psychiatry*. 2016; 16(1):408. Epub 2016/11/20. <https://doi.org/10.1186/s12888-016-1083-3> PMID: 27855666; PubMed Central PMCID: PMC5114822.
  19. Tao S, Wu X, Zhang S, Tong S, Hao J, Tao F. Association of alcohol use with problematic mobile phone use and depressive symptoms among collegestudents in Anhui, China. *J Public Heal*. 2017; 25(1):103–12.
  20. Tao S, Wu X, Zhang S, Tong S, Hao J, Tao F. Association of alcohol use with problematic mobile phone use and depressive symptoms among college students in Anhui, China. *Journal of Public Health*. 2017; 25(1):103–12. <https://doi.org/10.1007/s10389-016-0766-z>
  21. Wang C, Wang SY, Li WH, Dong XM, Chi GB. [Study on the mobile phone dependence syndrome and its distribution among 2213 college students in Guangzhou]. *Zhonghua liu xing bing xue za zhi = Zhonghua liuxingbingxue zazhi*. 2013; 34(10):949–52. Epub 2014/01/01. PMID: 24377983.
  22. Yuchang J, Cuicui S, Junxiu A, Junyi L. Attachment Styles and Smartphone Addiction in Chinese College Students: the Mediating Roles of Dysfunctional Attitudes and Self-Esteem. *International Journal of Mental Health and Addiction*. 2017; 15(5):1122–34. <https://doi.org/10.1007/s11469-017-9772-9>
  23. Zou Y, Xia N, Zou Y, Chen Z, Wen Y. Smartphone addiction may be associated with adolescent hypertension: a cross-sectional study among junior school students in China. *BMC Pediatr*. 2019; 19(1):310–. <https://doi.org/10.1186/s12887-019-1699-9> PMID: 31484568.
  24. Bhatt N, Muninarayanappa NV, Nageshwar V. A study to assess the mobile phone dependence level and sleep quality among students of selected colleges of Moradabad. *Indian J Public Heal Res Dev*. 2017; 8(1):41–5.
  25. Dimple V, Wadde S, Gattani P. Mobile phone dependence among undergraduate medical students in Nanded city. *Annals of Tropical Medicine and Public Health*. 2017; 10(1):27–30. [https://doi.org/10.4103/atmph.atmph\\_71\\_17](https://doi.org/10.4103/atmph.atmph_71_17).
  26. Nikhita CS, Jadhav PR, Ajinkya SA. Prevalence of Mobile Phone Dependence in Secondary School Adolescents. *Journal of clinical and diagnostic research: JCDR*. 2015; 9(11):Vc06–vc9. Epub 2015/12/18. <https://doi.org/10.7860/JCDR/2015/14396.6803> PMID: 26672469; PubMed Central PMCID: PMC4668509.
  27. Rajanna SH, Sharma MK, Palanichamy TS. Exploration of Technology use Pattern among Teenagers and its Relationship with Psychological Variables. *ASEAN J Psychiatry*. 2016; 17(2):239–49.
  28. Buctot DB, Kim N, Kim JJ. Factors associated with smartphone addiction prevalence and its predictive capacity for health-related quality of life among Filipino adolescents. *Children and Youth Services Review*. 2020; 110:104758. <https://doi.org/10.1016/j.chilyouth.2020.104758>.
  29. Tangmunkongvorakul A, Musumari PM, Thongpibul K, Srithanaviboonchai K, Techasrivichien T, Sugimoto SP, et al. Association of excessive smartphone use with psychological well-being among university students in Chiang Mai, Thailand. *PloS one*. 2019; 14(1):e0210294. Epub 2019/01/08. <https://doi.org/10.1371/journal.pone.0210294> PMID: 30615675; PubMed Central PMCID: PMC6322718.
  30. Tateno M, Kim DJ, Teo AR, Skokauskas N, Guerrero APS, Kato TA. Smartphone Addiction in Japanese College Students: Usefulness of the Japanese Version of the Smartphone Addiction Scale as a Screening Tool for a New Form of Internet Addiction. *Psychiatry investigation*. 2019; 16(2):115–20. Epub 2019/02/28. <https://doi.org/10.30773/pi.2018.12.25.2> PMID: 30808117; PubMed Central PMCID: PMC6393743.
  31. Haug S, Castro RP, Kwon M, Filler A, Kowatsch T, Schaub MP. Smartphone use and smartphone addiction among young people in Switzerland. *Journal of behavioral addictions*. 2015; 4(4):299–307. Epub 2015/12/23. <https://doi.org/10.1556/2006.4.2015.037> PMID: 26690625; PubMed Central PMCID: PMC4712764.
  32. Yang Z, Asbury K, Griffiths MD. Do Chinese and British University Students Use Smartphones Differently? A Cross-cultural Mixed Methods Study. *International Journal of Mental Health and Addiction*. 2019; 17(3):644–57. <https://doi.org/10.1007/s11469-018-0024-4>
  33. Kim S-G, Park J, Kim H-T, Pan Z, Lee Y, McIntyre RS. The relationship between smartphone addiction and symptoms of depression, anxiety, and attention-deficit/hyperactivity in South Korean adolescents. *Annals of general psychiatry*. 2019; 18:1–. <https://doi.org/10.1186/s12991-019-0224-8> PMID: 30899316.
  34. Wang P, Zhao M, Wang X, Xie X, Wang Y, Lei L. Peer relationship and adolescent smartphone addiction: The mediating role of self-esteem and the moderating role of the need to belong. *Journal of*

- behavioral addictions. 2017; 6(4):708–17. Epub 12/19. <https://doi.org/10.1556/2006.6.2017.079> PMID: 29254360.
35. Chung JE, Choi SA, Kim KT, Yee J, Kim JH, Seong JW, et al. Smartphone addiction risk and daytime sleepiness in Korean adolescents. *Journal of paediatrics and child health*. 2018; 54(7):800–6. Epub 2018/04/08. <https://doi.org/10.1111/jpc.13901> PMID: 29626363.
  36. Cheung T, Lee RLT, Tse ACY, Do CW, So BCL, Szeto GPY, et al. Psychometric Properties and Demographic Correlates of the Smartphone Addiction Scale-Short Version Among Chinese Children and Adolescents in Hong Kong. *Cyberpsychology, behavior and social networking*. 2019; 22(11):714–23. Epub 2019/10/18. <https://doi.org/10.1089/cyber.2019.0325> PMID: 31621411.
  37. Tateno M, Teo AR, Ukai W, Kanazawa J, Katsuki R, Kubo H, et al. Internet Addiction, Smartphone Addiction, and Hikikomori Trait in Japanese Young Adult: Social Isolation and Social Network. *Front Psychiatry*. 2019; 10:455–. <https://doi.org/10.3389/fpsy.2019.00455> PMID: 31354537.
  38. Kwon M, Kim D-J, Cho H, Yang S. The smartphone addiction scale: development and validation of a short version for adolescents. *PloS one*. 2013; 8(12):e83558–e. <https://doi.org/10.1371/journal.pone.0083558> PMID: 24391787.
  39. Lian L, You X, Huang J, Yang R. Who overuses Smartphones? Roles of virtues and parenting style in Smartphone addiction among Chinese college students. *Computers in Human Behavior*. 2016; 65:92–9. <https://doi.org/10.1016/j.chb.2016.08.027>.
  40. Morioka H, Itani O, Osaki Y, Higuchi S, Jike M, Kaneita Y, et al. The association between alcohol use and problematic internet use: A large-scale nationwide cross-sectional study of adolescents in Japan. *J Epidemiol*. 2017; 27(3):107–11. Epub 01/17. <https://doi.org/10.1016/j.je.2016.10.004> PMID: 28142042.
  41. Katz MH. *Multivariable Analysis: A Practical Guide for Clinicians and Public Health Researchers*. 3 ed. Cambridge: Cambridge University Press; 2011.
  42. Krejcie RV, Morgan DW. Determining Sample Size for Research Activities. *Educational and Psychological Measurement*. 1970; 30(3):607–10. <https://doi.org/10.1177/001316447003000308>
  43. Young KS. Internet Addiction: The Emergence of a New Clinical Disorder. *CyberPsychology & Behavior*. 1998; 1(3):237–44. <https://doi.org/10.1089/cpb.1998.1.237>
  44. Osada H. Internet addiction in Japanese college students: Is Japanese version of Internet Addiction Test (JIAT) useful as a screening tool? 2013; 3(1):71–80.
  45. Hongsaguansri S, Ruangkanhasetr S. The Thai version of Young Diagnostic Questionnaire for Internet Addiction Development. *Thai Annual Congress of Psychiatry*. 2007.
  46. Frangos CC, Frangos CC, Sotiropoulos I, editors. *A Meta-analysis of the Reliability of Young's Internet Addiction Test 2012*.
  47. Kim SE, Kim JW, Jee YS. Relationship between smartphone addiction and physical activity in Chinese international students in Korea. *Journal of behavioral addictions*. 2015; 4(3):200–5. Epub 2015/11/10. <https://doi.org/10.1556/2006.4.2015.028> PMID: 26551911; PubMed Central PMCID: PMC4627682.
  48. Demirci K, Akgonul M, Akpinar A. Relationship of smartphone use severity with sleep quality, depression, and anxiety in university students. *Journal of behavioral addictions*. 2015; 4(2):85–92. Epub 2015/07/02. <https://doi.org/10.1556/2006.4.2015.010> PMID: 26132913; PubMed Central PMCID: PMC4500888.
  49. Chiang JT, Chang FC, Lee KW, Hsu SY. Transitions in smartphone addiction proneness among children: The effect of gender and use patterns. *PloS one*. 2019; 14(5):e0217235. Epub 2019/05/31. <https://doi.org/10.1371/journal.pone.0217235> PMID: 31145738; PubMed Central PMCID: PMC6542513.
  50. Choi O, Jang KS, Kim NY. Factors Affecting the Internet Game Addiction Risk of Elementary School Students in Multicultural Families. *J Health Info Stat*. 2019; 44(1):64–72. <https://doi.org/10.21032/jhis.2019.44.1.64>
  51. Su W, Han X, Jin C, Yan Y, Potenza MN. Are males more likely to be addicted to the internet than females? A meta-analysis involving 34 global jurisdictions. *Computers in Human Behavior*. 2019; 99:86–100. <https://doi.org/10.1016/j.chb.2019.04.021>.
  52. Ono-Kihara M. *Sex Behavior of Teenagers in Contemporary Japan The WYSH Project*. Tokyo: Sanko Publisher Ltd. 2011:57. 2011.
